# Supplementary material for: Nuclear localization of the meiosis-specific transcription factor Ndt80 is regulated by the pachytene checkpoint
Source: PubMed Central journal article supplement — Mol Biol Cell. 2011 Jun 1;22(11):1878–86. doi: 10.1091/mbc.E10-12-1011 (PMC3103403; doi:10.1091/mbc.e10-12-1011), 2011-06-01
Supplement: E10-12-1011_1.pdf [file E10-12-1011_1.pdf]

## Supplemental Materials

### In-frame deletions of Ndt80

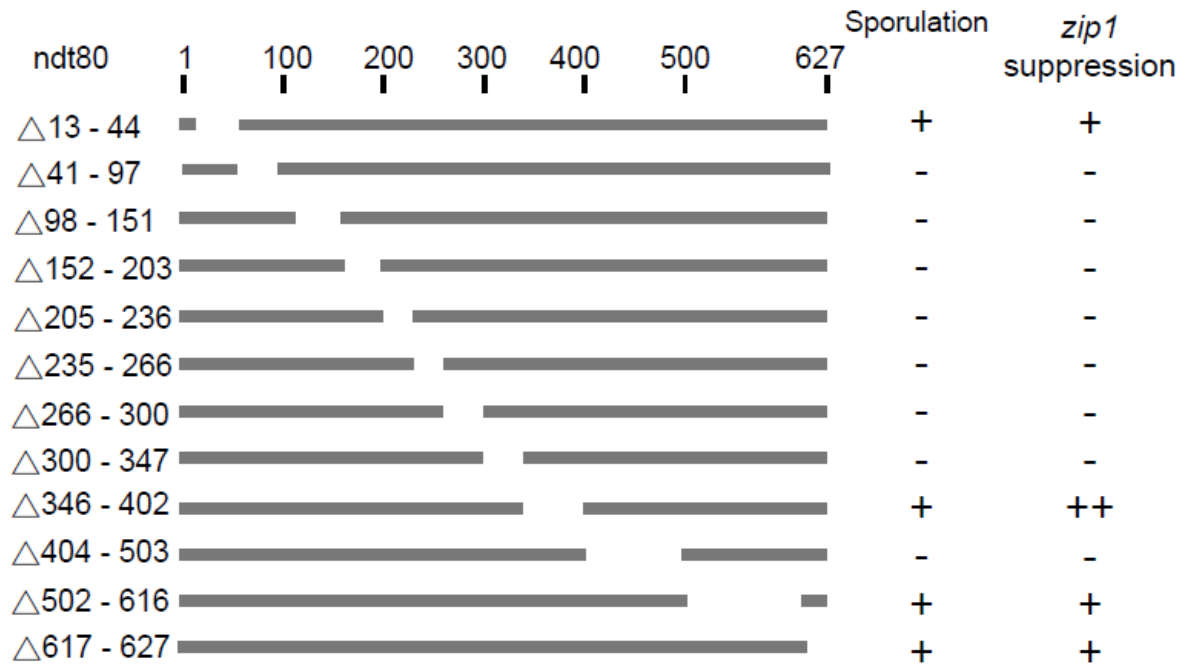

**Figure S1.** Schematic map of Ndt80 in-frame deletions.

The portion deleted in each mutant is shown by the gap; the amino acid residues deleted are indicated at the left ends. Relative sporulation efficiencies are represented with “-”, “+”, and “++”.

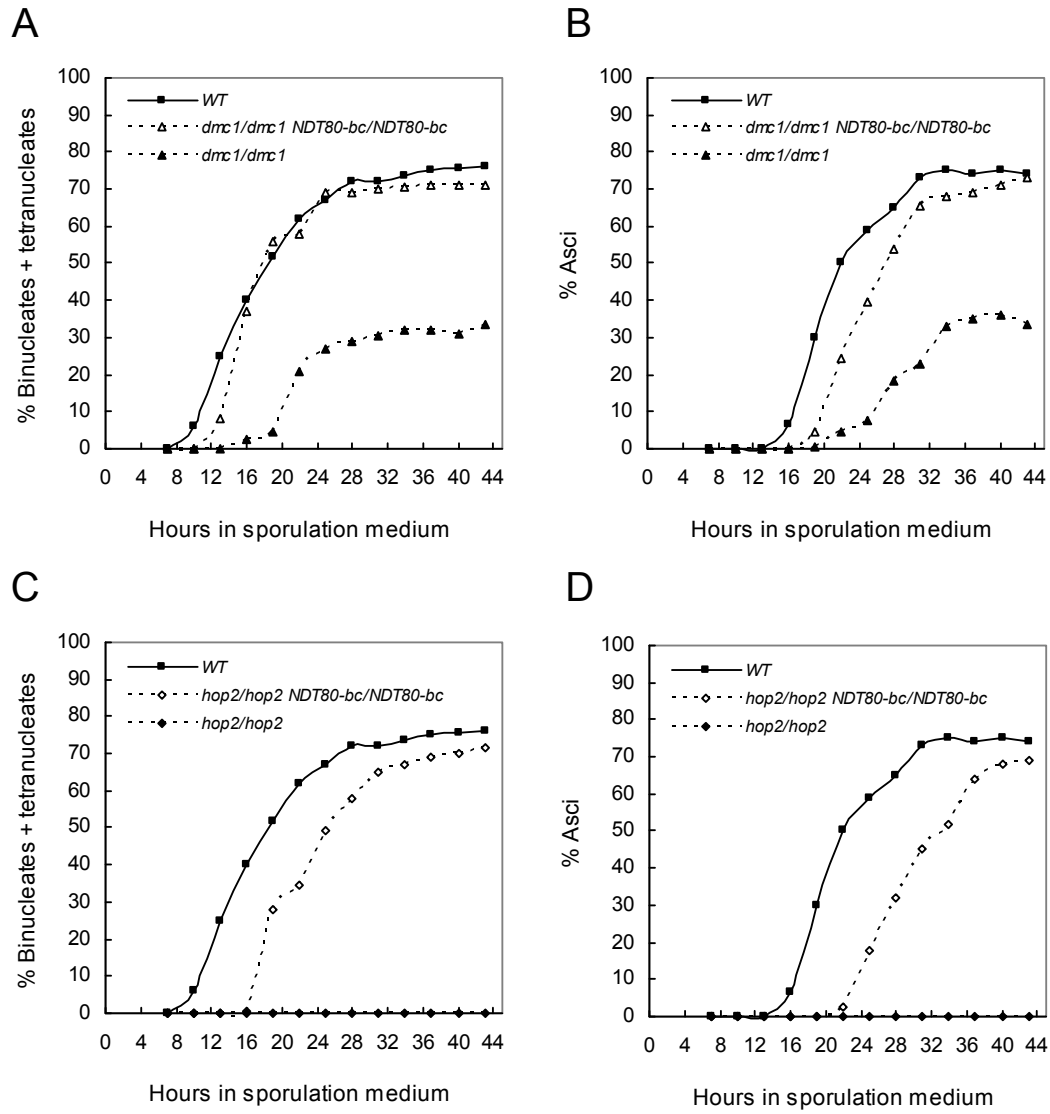

**Figure S2.** *NDT80-bc* suppresses sporulation defects of *dmc1* and *hop2* mutants. Nuclear divisions and spore formation were examined in *dmc1* *NDT80-bc* (A and B) and in *hop2* *NDT80-bc* strains. These experiments were repeated with similar results.

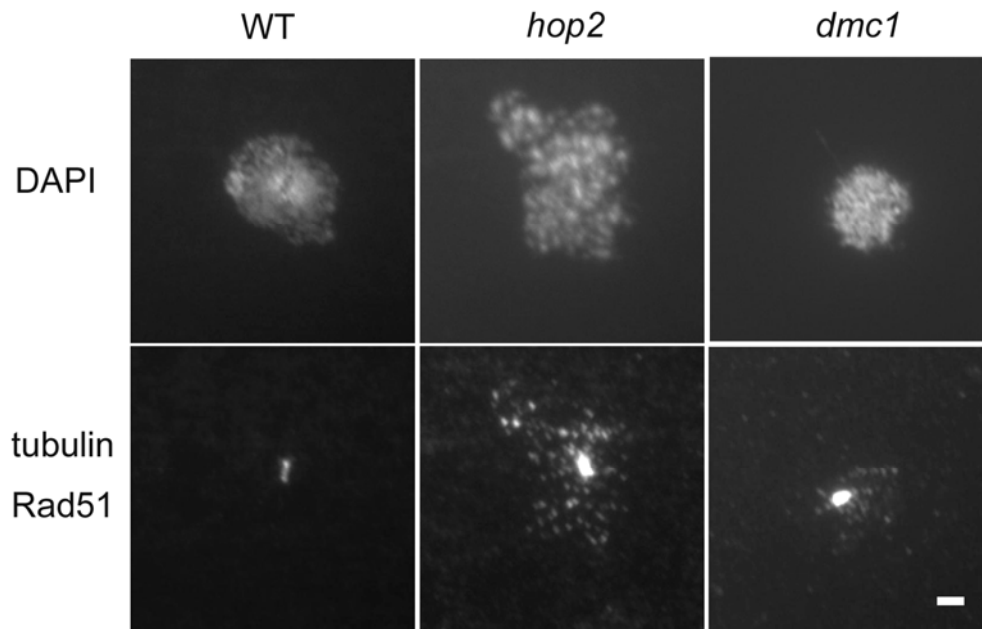

**Figure S3.** Analysis of Rad51 foci in post-pachytene nuclei.

Spread nuclei from the *NDT80-bc* (WT), *hop2 NDT80-bc*, and *dmc1 NDT80-bc* psot-pachytene cells were stained with DAPI (upper panels), anti-tubulin, and anti-Rad51 antibodies (lower panels). Scale bar, 2 $\mu$ m.

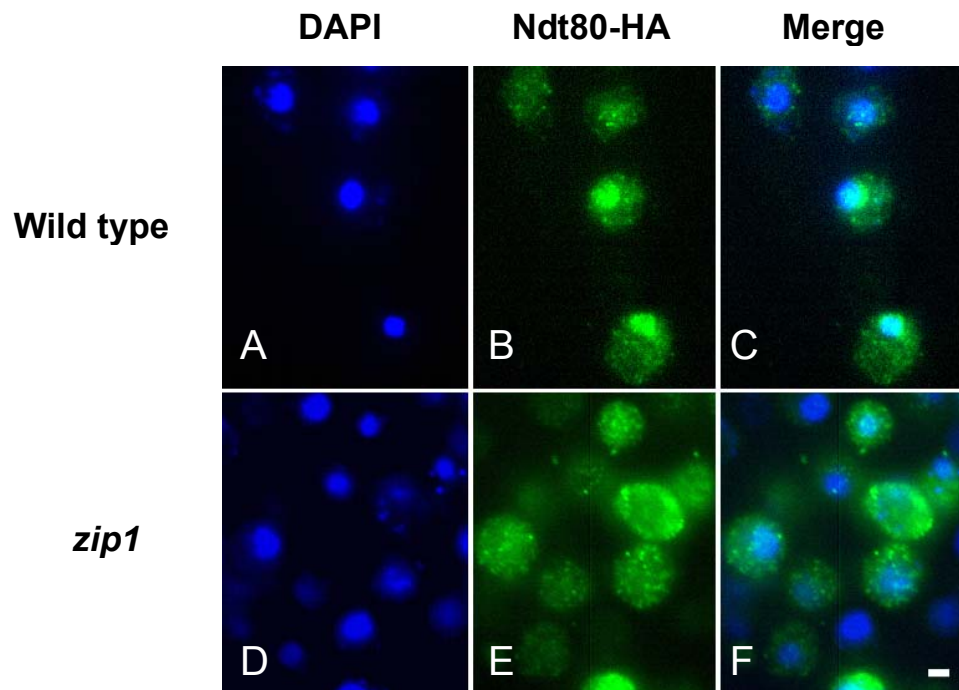

**Figure S4.** Nuclear localization of NDT80.

*NDT80-HA/NDT80-HA* cells (A-C) and *zip1/zip1 NDT80-HA/NDT80-HA* cells (D-F) were stained with DAPI (A and D) and anti-HA antibodies (B and E). Merged images are shown in (C and F). Scale bar, 2 $\mu$ m.

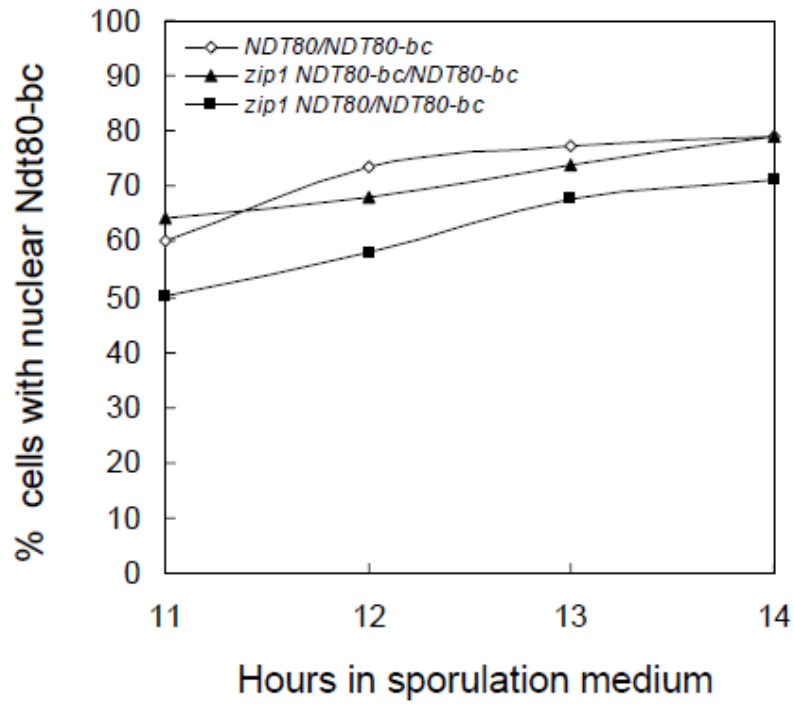

**Figure S5.** Nuclear localization of Ndt80-bc is delayed in *zip1 NDT80/NDT80-bc*. The portions of mononucleate cells with nuclear localized Ndt80-bc were examined for *NDT80-HA/NDT80-bc-myc*, *zip1/zip1 NDT80-bc-myc /NDT80-bc-myc*, and *zip1/zip1 NDT80-HA/NDT80-bc-myc*.

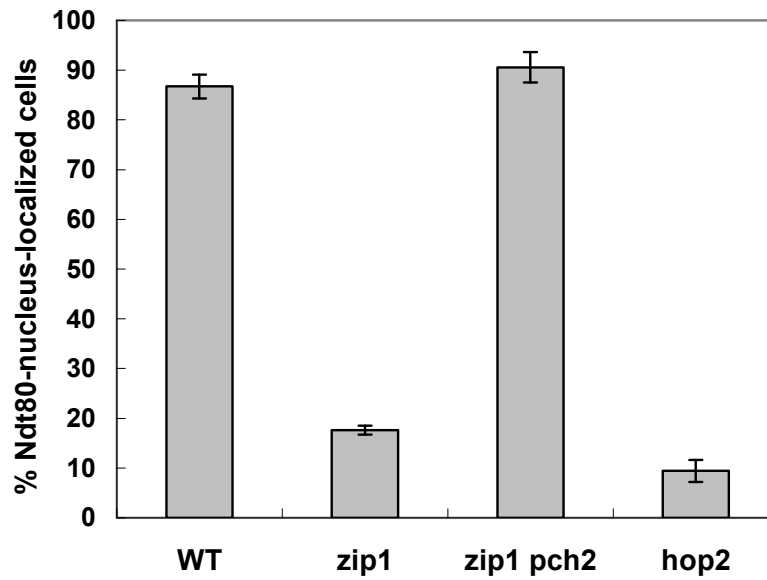

**Figure S6.** Nuclear localization of Ndt80 is regulated by the pachytene checkpoint. Nuclear localization of Ndt80 were examined in *NDT80-HA/NDT80-bc-myc* (WT), *zip1 NDT80-HA/NDT80-bc-myc* (zip1), *zip1 pch2 NDT80-HA/NDT80-bc-myc* (zip1 pch2), and *hop2 NDT80-HA/NDT80-bc-myc* (hop2) cells. Cells with nuclear signal of Ndt80-bc were examined and counted for Ndt80 localization. Averages of three repeats for each strain were presented. A total of at least 108 cells were scored for each strain.
